# Supplementary material for: Bis(diphenylamino)-9,9′-spirobifluorene functionalized Ir(iii) complex: a conceptual design en route to a three-in-one system possessing emitting core and electron and hole transport peripherals
Source: Royal Society of Chemistry journal article supplement (doi:10.1039/c0jm02097d), 2010-11-04
Supplement: c0jm02097d.pdf [file c0jm02097d.pdf]

## ***Supporting Information***

### **The 2,7-Bis(diphenylamino)-9,9'-spirobifluorene Functionalized Ir(III) Complex; A Conceptual Design En Route to A Three-in-one System Possessing Emitting Core and Electron and Hole Transport Peripherals**

Hsiao-Fan Chen, Ken-Tsung Wong\*, Yi-Hung Liu, Yu Wang, Yi-Ming Cheng,  
Min-Wen Chung and Pi-Tai Chou\* and Hai-Ching Su

H.-F. Chen, Prof. K.-T. Wong,  
Department of Chemistry,  
National Taiwan University, Taipei 10617 (Taiwan)  
Fax (+886) 2-3366-1667; Tel: (+886)2-3366-1665; E-mail: [kenwong@ntu.edu.tw](mailto:kenwong@ntu.edu.tw)

Y.-H. Liu, Y. Wang, Y.-M. Cheng, M.-W. Chung, Prof. P.-T. Chou,  
Department of Chemistry,  
National Taiwan University, Taipei 10617 (Taiwan)  
Fax: (+886)2-2369-5208; E-mail: [chop@ntu.edu.tw](mailto:chop@ntu.edu.tw)

H.-C. Su  
Institute of Lighting and Energy Photonics,  
National Chiao Tung University, Tainan 71150 (Taiwan)

**Table S1.** Calculated energy levels, oscillator strength ( $f$ ), orbital transition analyses and %MLCT for complex **3**. Note: The TDDFT calculation is combined with an integral equation formalism-polarizable continuum model (IEF-PCM) in acetonitrile to consider the solvation effect.

| States         | $\lambda_{\text{cal}}$ | $f$    | Assignments        | MLCT (%) |
|----------------|------------------------|--------|--------------------|----------|
| T <sub>1</sub> | 682.2                  | 0      | HOMO→LUMO (100%)   | 0        |
| S <sub>1</sub> | 681.5                  | 0.0002 | HOMO→LUMO (100%)   | 0        |
| T <sub>2</sub> | 544                    | 0      | HOMO-1→LUMO (99%)  | 0        |
| S <sub>2</sub> | 539.5                  | 0.0001 | HOMO-1→LUMO (99%)  | 0        |
| T <sub>3</sub> | 526                    | 0      | HOMO-2→LUMO (100%) | 32.6     |
| S <sub>3</sub> | 525.8                  | 0.0001 | HOMO-2→LUMO (100%) | 32.6     |

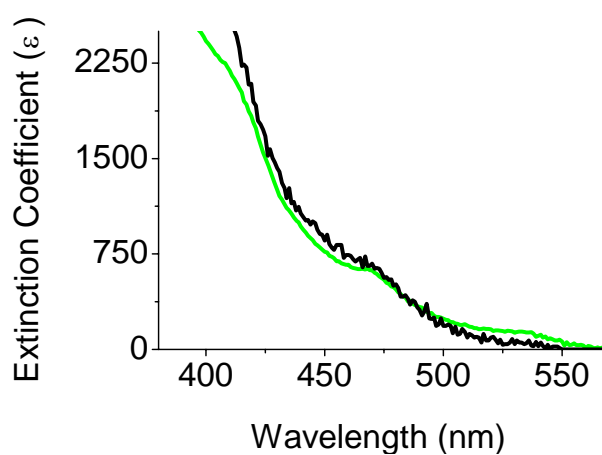

**Figure S1** Expanded UV-Vis absorption spectra of complexes **2** (green) and **3** (black) between 400 ~ 560 nm in acetonitrile.

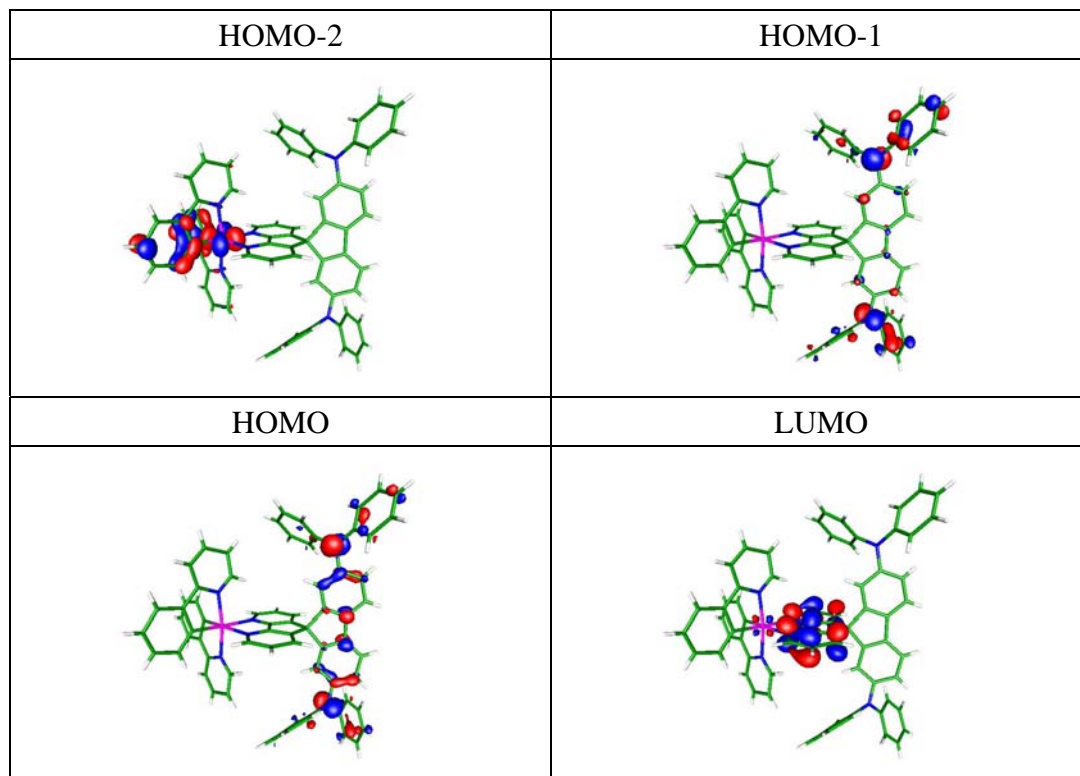

**Figure S2.** Frontier orbitals involved in the lower-lying electronic transitions for **3**.
